# Supplementary material for: Effectiveness and Safety of Mitral Valve Plasty in Patients with an Anomalous Origin of the Coronary Artery from the Pulmonary Artery
Source: MDPI journal article supplement (doi:10.3390/jcdd10020075), 2023-02-09
Supplement: s1 [file s1]

## **Effectiveness and Safety of Mitral Valve Plasty in Patients with an Anomalous**

### **Origin of the Coronary Artery from the Pulmonary Artery**

#### **(Supplementary Materials)**

**Supplementary information.** Surgical procedures of Direct reimplantation, Takeuchi operation, and mitral valve plasty.

**Table S1.** Baseline characteristics of ACAPA patients with and without mitral valve plasty.

**Table S2.** Mitral valve pathology, MVR grade preoperatively, operative techniques of MVP, and MVR grade postoperatively in all 26 patients.

**Table S3.** Detailed baseline information of TCAPA patients.

## **Surgical Procedures**

All patients underwent median sternotomy, bicaval cannulation, and hypothermic cardiopulmonary bypass. Thirty-four patients (85%) through the aortic root and six patients (15%) through the aortic root and main pulmonary artery (PA), all of whom were perfused with crystalloid cardiac arrest solution to induce cardiac arrest. The pulmonary aorta (PA) was transected proximal to the bifurcation and the location of the anomalous opening was determined. Depending on the anatomical location of the anomalous coronary artery ostium, direct reimplantation was preferred when the coronary ostium arose from the right facing or anterior sinus of Valsalva of the pulmonary artery, while Takeuchi operation was more often performed when the anomalous coronary ostium arose from the non facing pulmonary sinus. In our center, anomalous coronary artery treatment was accomplished mainly by direct aortic reimplantation (34 cases) or tunneling (6 cases).

*Direct reimplantation.* Twenty-eight (82%) left coronary arteries, three (8.8%) left and right coronary arteries, and three (8.8%) anomalous single coronary arteries were removed in button-shaped cuffs and subsequently mobilized. The aorta was opened transversely to create an opening for the left coronary sinus in 28 patients, the left and right coronary sinuses in 3 patients, and the right coronary sinus in 3 patients. The coronary button was tension-free anastomosed to the aorta from within the aortic lumen through 7-0 absorbable continuous sutures. The pulmonary artery trunk was reconstructed with an autologous pericardial patch and PA continuity was restored by direct end-to-end anastomosis.

*Takeuchi operation.* A hole was made in the right wall of the main PA, opening the aorta obliquely and creating an aortopulmonary window in the left wall of the aorta with a 4- or 4.5- mm puncher, taking care to avoid damaging the aortic valve leaflets. Both holes were approached with 5-0 absorbable sutures. A coronary tunnel was then created with a bovine pericardial patch for the left coronary artery in six cases, approximating the posterior wall of the main PA and along the nadir of the Valsalva sinus back to the aortopulmonary window. The anterior defect of the main PA was covered with autologous pericardium.

*mitral valvuloplasty.* Twenty-six patients underwent simultaneous mitral valve plasty (MVP). (Details in **Table S2**).

Table S1. Baseline characteristics of ACAPA patients with and without mitral valve repair

| Variables                          | non-MVP (moderate)<br>(n=10) | MVP (moderate)<br>(n=13) | MVP (severe)<br>(n=13) | <i>P</i><br>value |
|------------------------------------|------------------------------|--------------------------|------------------------|-------------------|
| Concomitant cardiovascular anomaly |                              |                          |                        |                   |
| PAS                                | 0 (0.0)                      | 1 (7.7)                  | 0 (0.0)                | 0.345             |
| PDA                                | 0 (0.0)                      | 1 (7.7)                  | 0 (0.0)                | 0.345             |
| VSD                                | 0 (0.0)                      | 1 (7.7)                  | 0 (0.0)                | 0.345             |
| ASD                                | 0 (0.0)                      | 2 (15.4)                 | 0 (0.0)                | 0.112             |
| PFO                                | 2 (14.3)                     | 0 (0.0)                  | 2 (15.4)               | 0.342             |
| Overriding aorta                   | 0 (0.0)                      | 1 (7.7)                  | 0 (0.0)                | 0.345             |

Abbreviation: ASD, atrial septal defect; PAS, Pulmonary artery stenosis; PDA, Patent ductus arteriosus; PFO, patent foramen ovale; PVS, Pulmonary valve stenosis; VSD, Ventricular septal defect.

Table S2 MV pathology, MR grade preoperatively, operative techniques of MVP, and MR grade postoperatively in all 26 patients

| Patient | pre-operation<br>MVR grade | age (year) | MV pathology                                                                                     | MV repair technique                                                    | MR grade<br>at last visit |
|---------|----------------------------|------------|--------------------------------------------------------------------------------------------------|------------------------------------------------------------------------|---------------------------|
| 1       | Moderate                   | 1.5        | Chorda tendineae fibrosis; Ring dilatation                                                       | Bilateral commissuroplasty                                             | mild                      |
| 2       | Moderate                   | 2.7        | Ring dilatation                                                                                  | Posterior annuloplasty                                                 | moderate                  |
| 3       | Moderate                   | 26.0       | Mitral valve leaflet thickening; Ring dilatation                                                 | Ring annuloplasty                                                      | none                      |
| 4       | Moderate                   | 0.5        | Chorda tendineae fibrosis; Papillary muscle fibrosis; Ring dilatation                            | Bilateral commissuroplasty                                             | none                      |
| 5       | Moderate                   | 0.5        | Chorda tendineae fibrosis; Prolapse of anterior and posterior leaflet;<br>Anterior leaflet cleft | Posterior annuloplasty;<br>Triangular resection of anterior leaflet    | none                      |
| 6       | Moderate                   | 6.0        | Chorda tendineae fibrosis; Papillary muscle fibrosis; Ring dilatation                            | Posterior annuloplasty; release of<br>papillary muscle                 | moderate                  |
| 7       | Moderate                   | 4.6        | Ring dilatation; Chorda tendineae fibrosis                                                       | Bilateral commissuroplasty                                             | moderate                  |
| 8       | Moderate                   | 1.5        | Chorda tendineae fibrosis; Ring dilatation                                                       | Posterior annuloplasty                                                 | none                      |
| 9       | Moderate                   | 60.0       | Ring dilatation                                                                                  | Ring annuloplasty                                                      | mild                      |
| 10      | Moderate                   | 3.8        | Chorda tendineae fibrosis; Prolapse of anterior and posterior leaflet                            | Annular reduction sutures;<br>Triangular resection of anterior leaflet | mild                      |
| 11      | Moderate                   | 9.0        | Ring dilatation                                                                                  | Posterior annuloplasty                                                 | none                      |
| 12      | Moderate                   | 27.0       | Ring dilatation                                                                                  | Ring annuloplasty                                                      | none                      |
| 13      | Moderate                   | 10.0       | Papillary muscle fibrosis; Ring dilatation                                                       | Bilateral commissuroplasty                                             | mild                      |

|    |        |      |                                                                                                                                   |                                                                                  |          |
|----|--------|------|-----------------------------------------------------------------------------------------------------------------------------------|----------------------------------------------------------------------------------|----------|
| 14 | Severe | 42.0 | Chorda tendineae fibrosis; Papillary muscle fibrosis; Mitral valve leaflet thickening                                             | Ring annuloplasty                                                                | none     |
| 15 | Severe | 24.0 | Ring dilatation                                                                                                                   | Ring annuloplasty                                                                | none     |
| 16 | Severe | 1.3  | Prolapse of anterior and posterior leaflet; Mitral valve leaflet thickening; Chorda tendineae fibrosis; Papillary muscle fibrosis | Bilateral commissuroplasty; release of papillary muscle                          | mild     |
| 17 | Severe | 2.4  | Prolapse of anterior leaflet; Ring dilatation                                                                                     | Annular reduction sutures                                                        | severe   |
| 18 | Severe | 0.3  | Ring dilatation; Papillary muscle fibrosis                                                                                        | Posterior annuloplasty                                                           | mild     |
| 19 | Severe | 0.7  | Chorda tendineae fibrosis; Prolapse of anterior leaflet; Ring dilatation                                                          | Bilateral commissuroplasty                                                       | mild     |
| 20 | Severe | 2.9  | Chorda tendineae fibrosis; Papillary muscle fibrosis; Prolapse of anterior leaflet; Ring dilatation                               | Bilateral commissuroplasty                                                       | moderate |
| 21 | Severe | 5.9  | Chorda tendineae fibrosis; Papillary muscle fibrosis; Mitral valve leaflet thickening                                             | Bilateral commissuroplasty                                                       | mild     |
| 22 | Severe | 8.0  | Chorda tendineae fibrosis; Papillary muscle fibrosis; Prolapse of anterior leaflet; Ring dilatation                               | Posterior annuloplasty; release of papillary muscle                              | moderate |
| 23 | Severe | 21.0 | Ring dilatation; Mitral valve leaflet thickening                                                                                  | Ring annuloplasty                                                                | mild     |
| 24 | Severe | 48.0 | Mitral valve leaflet thickening; Ring dilatation                                                                                  | Ring annuloplasty                                                                | none     |
| 25 | Severe | 13.0 | Chorda tendineae fibrosis; Papillary muscle fibrosis; Prolapse of posterior leaflet                                               | Posterior annuloplasty; Shortening of leaflet chords                             | none     |
| 26 | Severe | 0.2  | Ring dilatation; Mitral valve leaflet thickening; Chorda tendineae fibrosis; Papillary muscle fibrosis; Anterior leaflet cleft    | Posterior annuloplasty; release of papillary muscle; shortening of leaflet chord | severe   |

Abbreviation: MVR: mitral valve regurgitation; MV: mitral valve.

Table S3 Detailed baseline information of TCAPA patients

| No | Age<br>(year) | Gender | Symptoms                               | LVEF | MVR      | TVR    | Concomitant<br>cardiovascular<br>anomaly | Single<br>coronary<br>artery<br>anomaly | Origin                             | The course<br>between the Ao<br>and Po |
|----|---------------|--------|----------------------------------------|------|----------|--------|------------------------------------------|-----------------------------------------|------------------------------------|----------------------------------------|
| 1  | 8.0           | Female | Shortness of<br>breath for 2 years     | 45   | Severe   | None   | None                                     | No                                      | From right and left cusp           | Without                                |
| 2  | 9.0           | Female | Lips purple<br>attack when<br>crying   | 68.7 | Moderate | Severe | TOF                                      | Yes                                     | From right cusp                    | Without                                |
| 3  | 1.3           | Female | Physical<br>examination<br>found       | 36   | Moderate | None   | None                                     | No                                      | From left cusp                     | With                                   |
| 4  | 0.3           | Female | Intermittent<br>shortness of<br>breath | 41   | Moderate | Severe | ASD                                      | Yes                                     | From right cusp                    | With                                   |
| 5  | 1.5           | male   | Disgust activity,<br>sweaty            | 20   | Moderate | None   | None                                     | No                                      | From right cusp                    | With                                   |
| 6  | 0.2           | Female | Shortness of<br>breath                 | 71   | Severe   | None   | PFO                                      | Yes                                     | From the right pulmonary<br>artery | With course<br>along one side<br>of Po |

Abbreviation: Ao, aorta; ASD, atrial septal defect; LVEF, left ventricular ejection fraction; MVR, mitral valve regurgitation; Po, pulmonary artery; PFO, patent foramen ovale; TOF, Tetralogy of Fallot; TVR, tricuspid valve regurgitation.
